# Supplementary material
Source: publisher figshare collection journal article supplement (https://gsajournals.figshare.com/articles/dataset/_/14696256)
Supplement: Supplementary file 1 [file 1]

Supplementary information for

**The Genetic Basis of Differential Autodiploidization in Evolving Yeast Populations**

Sudipta Tung, Christopher W. Bakerlee, Angela M. Phillips, Alex N. Nguyen Ba, Michael M. Desai

## **Text S1. Data clean up prior to QTL analysis**

Based on standard recommendations (Broman and Sen 2009), prior to QTL mapping following diagnostic probes were computed to ensure quality and integrity of the dataset.

**Segregation distortion:** Under normal circumstances BY and W303 alleles for each locus should segregate equally. To test this, we inspected genotype frequencies at each marker locus using function `geno.table`. 30 loci failed  $\chi^2$  test for deviation from Mendelian proportions (i.e. 1:1, here). They were dropped from subsequent analysis.

**Compare individuals' genotypes:** In order to identify pairs of segregants with unusually similar genotypes across all loci, we compared genotypes for each pair of individuals using the `comparegeno` function. One pair of segregants had >99% similarity in genotype identity, was detected as an outlier (Grubb's test:  $Q = 5.81$ ,  $p = 0.0002$ ) and therefore removed from the subsequent analysis.

**Counting crossovers:** The number of crossover events observed for each segregant was computed using the `countXO` function. The number of crossovers was found to be unreasonably high for one segregant (Grubb's test:  $Q = 9.68$ ,  $p < 10^{-16}$ ), and this segregant was removed from further analysis.

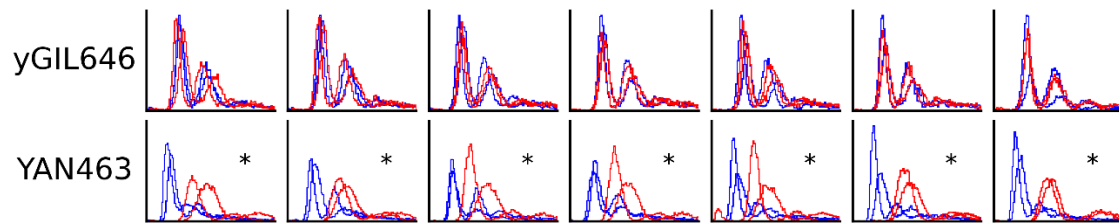

**Figure S1. The ploidy state of the 7 replicate populations of the parental strains before and after 500-generation evolution.** The plots show FITC histograms of Sytox-stained cells of each population, where the x-axis is in arbitrary fluorescence units (linear), and the y-axis is frequency. Blue and red curves denote the two technical replicate runs for each of the initial and final timepoints of evolution respectively. Populations where autodiploidization has been observed are marked by asterisks.

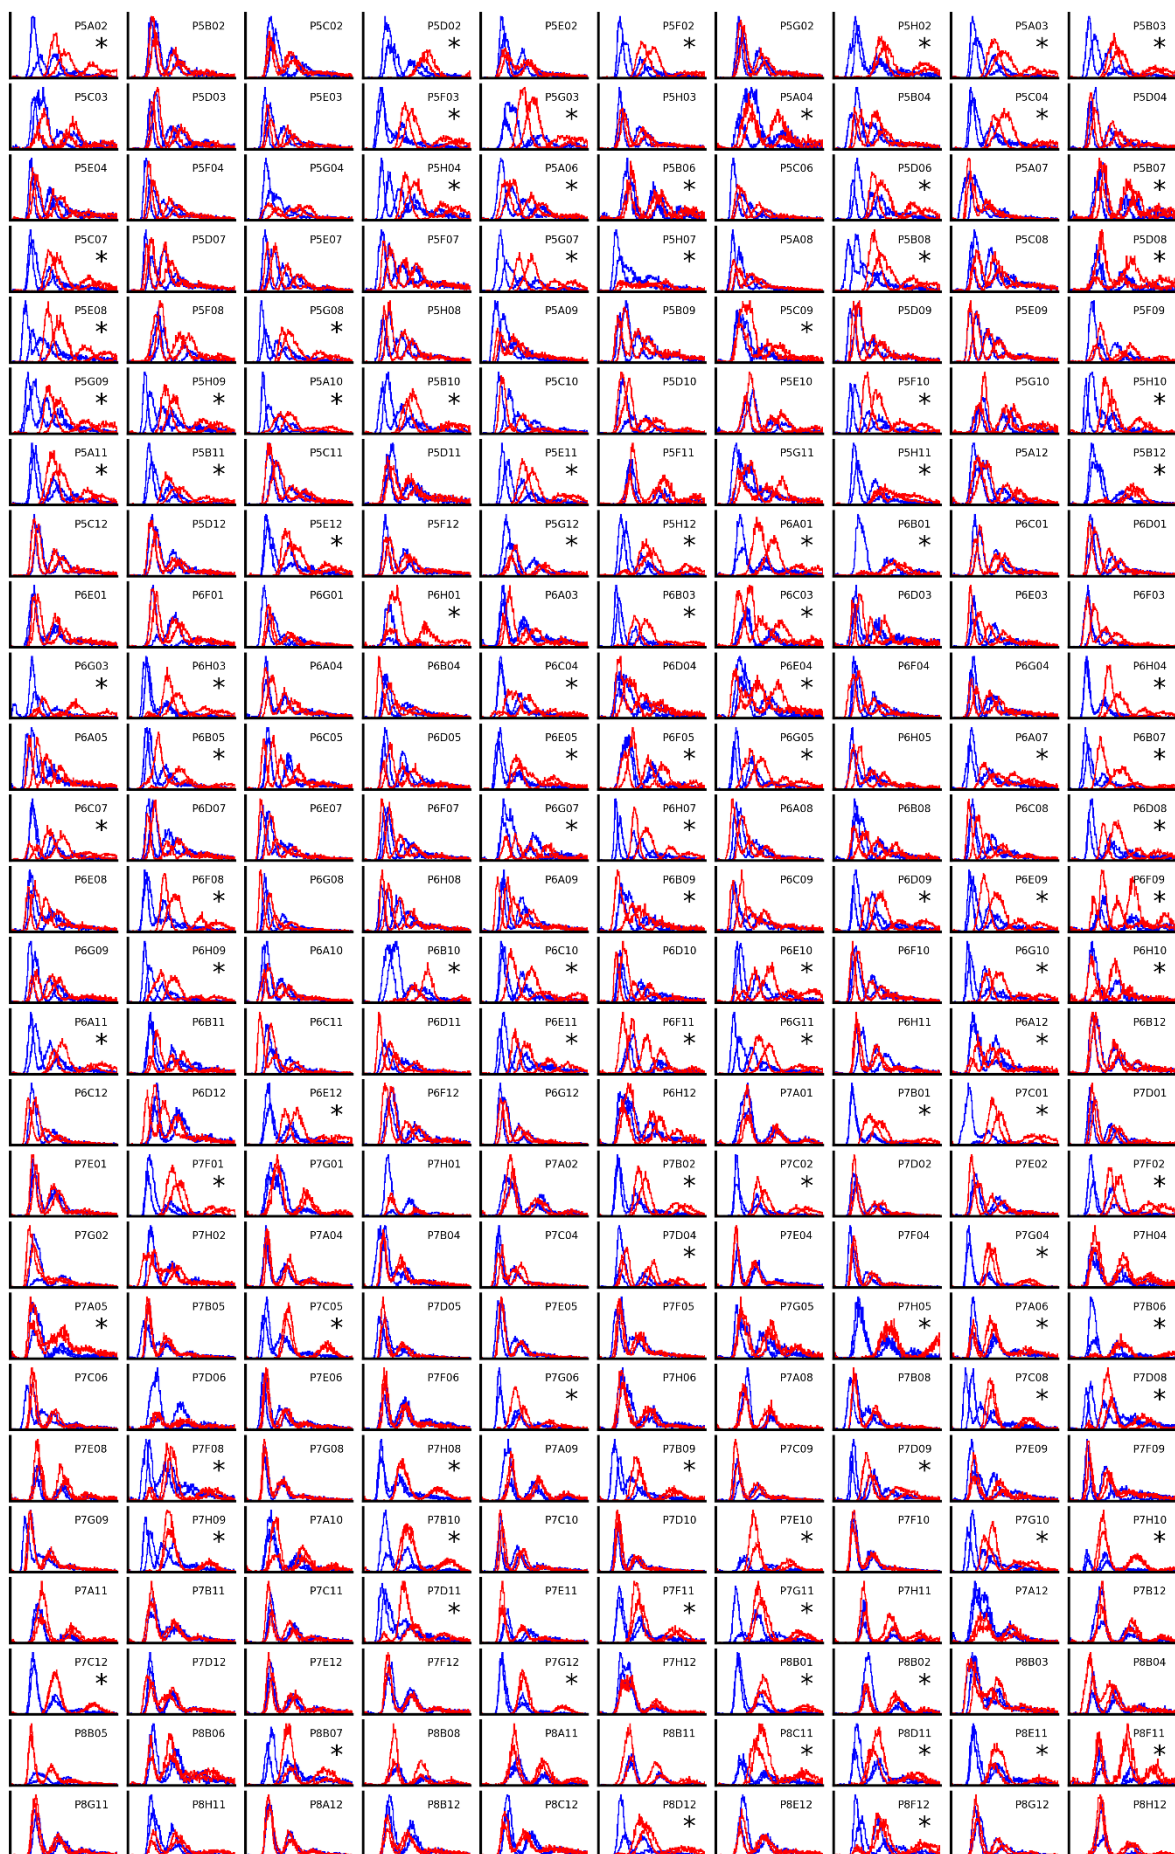

**Figure S2. The ploidy state of the 260 tetrad populations before and after 500-generation evolution.** The plots show FITC histograms of Sytox-stained cells of each population, where the x-axis is in arbitrary fluorescence units (linear), and the y-axis is frequency. Code starting with 'P' on each panel indicates population ID. Blue and red curves denote the two technical replicate runs for each of the initial and final timepoints of evolution respectively. Populations where autodiploidization has been observed are marked by asterisks.

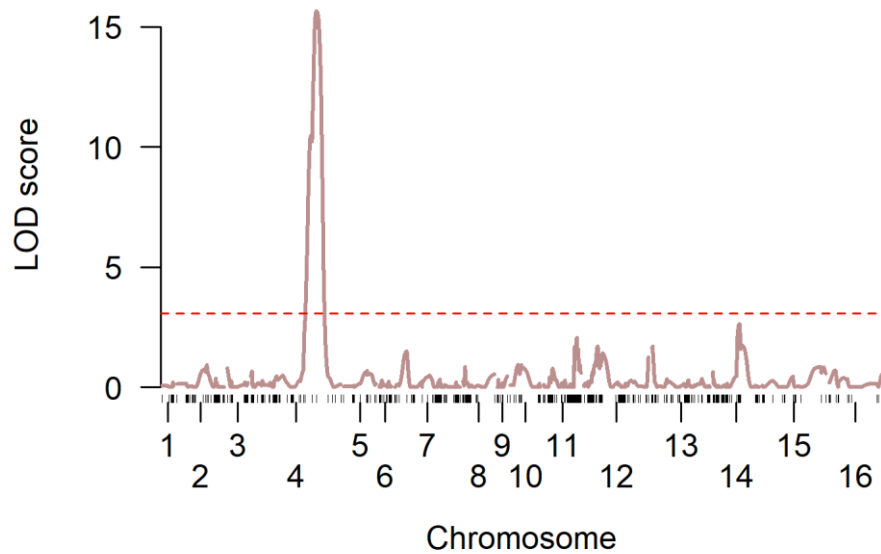

**Figure S3. LOD score for variation in autopolyploidization obtained using the Haley–Knott regression method is plotted against the genetic map.** The red dashed line indicates a 5% LOD significance threshold computed from 10,000 permutations. The single statistically significant QTL is identical to that of Figure 2C and falls within the *SSD1* locus.

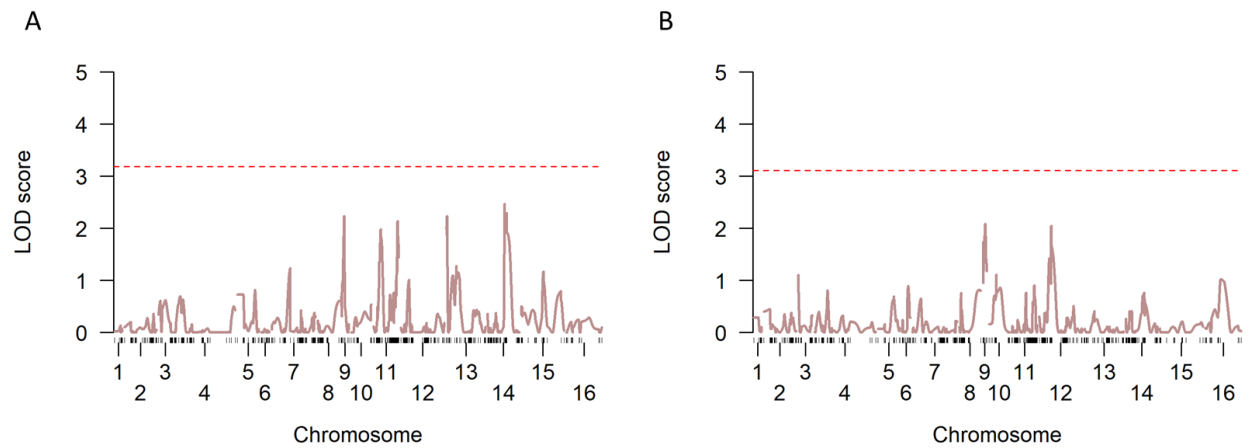

**Figure S4. LOD score for variation in autopolyploidization obtained using standard interval mapping method after regressing out the statistically significant chromosome IV QTL.** The red dashed line indicates a 5% LOD significance threshold computed from 10,000 permutations. No additional statistically significant QTL are present for the segregants with (A) BY and (B) W303 allele of the chromosome IV QTL.

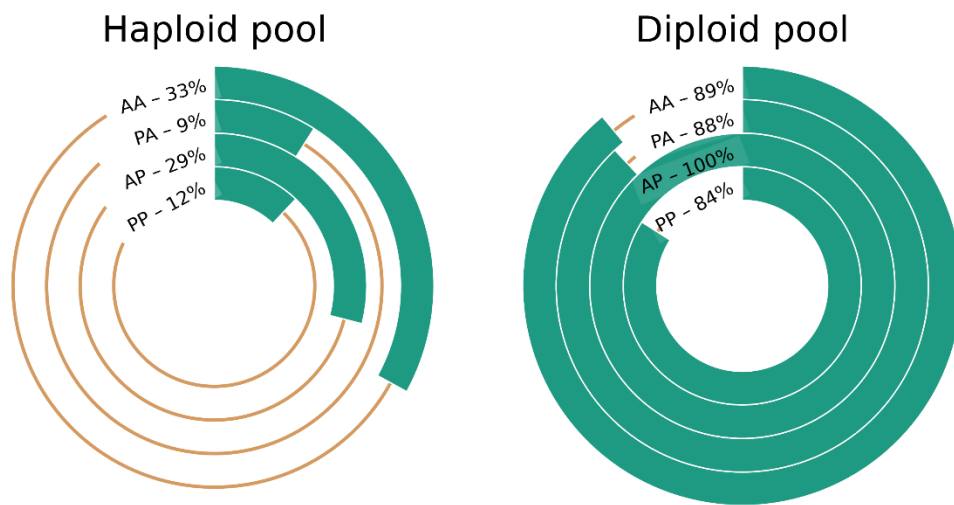

**Figure S5. Percentage of sequencing reads at *SSD1* locus matching BY allele in haploid and diploid pools of the ‘selected spores.’** The two-letter code for each plot indicate whether they are auxotrophic (A) or prototrophic (P) for Tryptophan and Lysine, (e.g. ‘PA’ denotes the spores that are prototrophic for Tryptophan but auxotrophic for Lysine). Irrespective of the auxotrophy status, the BY allele is substantially enriched in the diploid pool, whereas it is depleted in the haploid pool.

**Table S1. Occurrence of autodiploidization in “tetrad spores,” categorized by prototrophy or auxotrophy for tryptophan, uracil, and lysine.**

| <b>Tryptophan</b> |                     |                  |                     |                  |
|-------------------|---------------------|------------------|---------------------|------------------|
|                   | Num. haploid        | % haploid        | Num. diploid        | % diploid        |
| Auxotrophic       | 80                  | 63%              | 47                  | 37%              |
| Prototrophic      | 65                  | 50%              | 66                  | 50%              |
| <b>Uracil</b>     |                     |                  |                     |                  |
|                   | Num. haploid        | % haploid        | Num. diploid        | % diploid        |
| Auxotrophic       | 69                  | 54%              | 58                  | 46%              |
| Prototrophic      | 76                  | 58%              | 55                  | 42%              |
| <b>Lysine</b>     |                     |                  |                     |                  |
|                   | <b>Num. haploid</b> | <b>% haploid</b> | <b>Num. diploid</b> | <b>% diploid</b> |
| Auxotrophic       | 62                  | 49%              | 64                  | 51%              |
| Prototrophic      | 83                  | 63%              | 49                  | 37%              |

**Table S2. Non-synonymous differences between SSD1 alleles of strains examined in this study.**

| Strain    | Amino acid position in <i>SSD1</i><br><i>total length = 1250 AAs</i> |     |     |      |      |      |
|-----------|----------------------------------------------------------------------|-----|-----|------|------|------|
|           | 377                                                                  | 693 | 698 | 1190 | 1196 | 1250 |
| BY4741    | S                                                                    | T   | Y   | S    | A    | V    |
| W303      | S                                                                    | T   | *   | S    | A    | V    |
| RM11-1a   | S                                                                    | T   | Y   | S    | A    | V    |
| DBVPG1106 | S                                                                    | T   | Y   | G    | P    | A    |
| Y55       | C                                                                    | M   | Y   | G    | P    | V    |
| SK1       | C                                                                    | M   | Y   | G    | P    | V    |
| YPS128    | S                                                                    | T   | Y   | G    | P    | A    |

## References

Broman, K.W., and S. Sen, 2009 *A Guide to QTL Mapping with R/qtl* New York: Springer.
